# Supplementary material for: Precise modulation of transcription factor levels identifies features underlying dosage sensitivity
Source: PubMed Central journal article supplement (PMC10181932; doi:10.1038/s41588-023-01366-2), 2023-04-06
Supplement: 41588_2023_1366_MOESM1_ESM.pdf [file 41588_2023_1366_MOESM1_ESM.pdf]

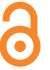

---

# Precise modulation of transcription factor levels identifies features underlying dosage sensitivity

---

In the format provided by the authors and unedited

---

**A**

## CNCC gating strategy

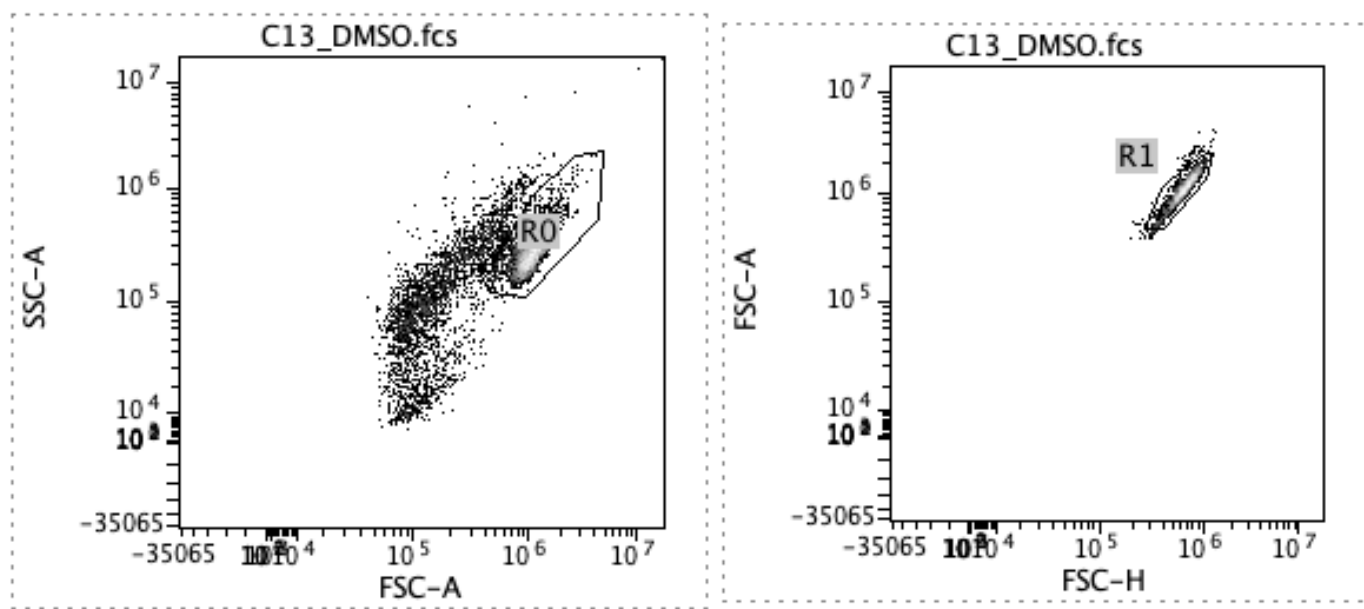**B**

## Chondrocyte gating strategy

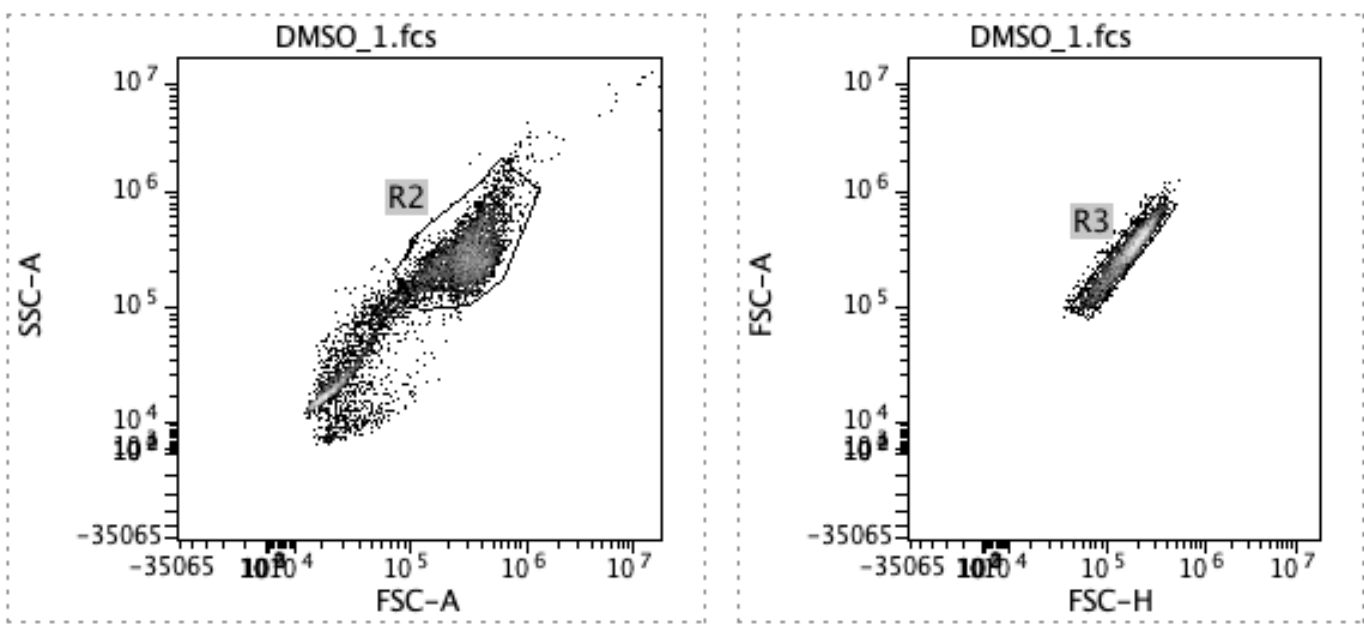

**Supplementary Figure 1.** Example gating strategy for viable, single CNCCs (A) or chondrocytes (B) based on forward (FSC) and side (SSC) scatter area (A) and height (H)
