# Supplementary material for: Precise modulation of transcription factor levels identifies features underlying dosage sensitivity
Source: PubMed Central journal article supplement (PMC10181932; doi:10.1038/s41588-023-01366-2), 2023-04-06

## B-actin

[dTAG<sup>V-1</sup>]  
M

| SOX9-tagged |                     |                     |                    |                    |                    | WT |                     |                     |                    |                    |                    |
|-------------|---------------------|---------------------|--------------------|--------------------|--------------------|----|---------------------|---------------------|--------------------|--------------------|--------------------|
| 0           | 5x10 <sup>-11</sup> | 5x10 <sup>-10</sup> | 5x10 <sup>-9</sup> | 5x10 <sup>-8</sup> | 5x10 <sup>-7</sup> | 0  | 5x10 <sup>-11</sup> | 5x10 <sup>-10</sup> | 5x10 <sup>-9</sup> | 5x10 <sup>-8</sup> | 5x10 <sup>-7</sup> |

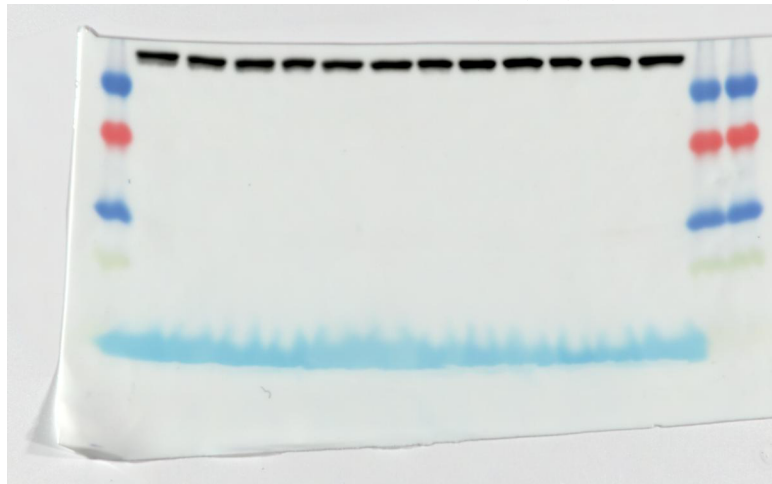

## SOX9

[dTAG<sup>V-1</sup>]  
M

| SOX9-tagged |                     |                     |                    |                    |                    | WT |                     |                     |                    |                    |                    |
|-------------|---------------------|---------------------|--------------------|--------------------|--------------------|----|---------------------|---------------------|--------------------|--------------------|--------------------|
| 0           | 5x10 <sup>-11</sup> | 5x10 <sup>-10</sup> | 5x10 <sup>-9</sup> | 5x10 <sup>-8</sup> | 5x10 <sup>-7</sup> | 0  | 5x10 <sup>-11</sup> | 5x10 <sup>-10</sup> | 5x10 <sup>-9</sup> | 5x10 <sup>-8</sup> | 5x10 <sup>-7</sup> |

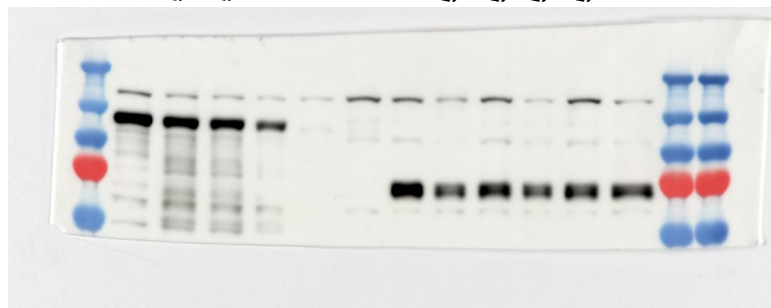

Supplement: 41588_2023_1366_MOESM5_ESM.pdf [file 41588_2023_1366_MOESM5_ESM.pdf]
