# Supplementary material for: Precise modulation of transcription factor levels identifies features underlying dosage sensitivity
Source: PubMed Central journal article supplement (PMC10181932; doi:10.1038/s41588-023-01366-2), 2023-04-06

Clones 1-24

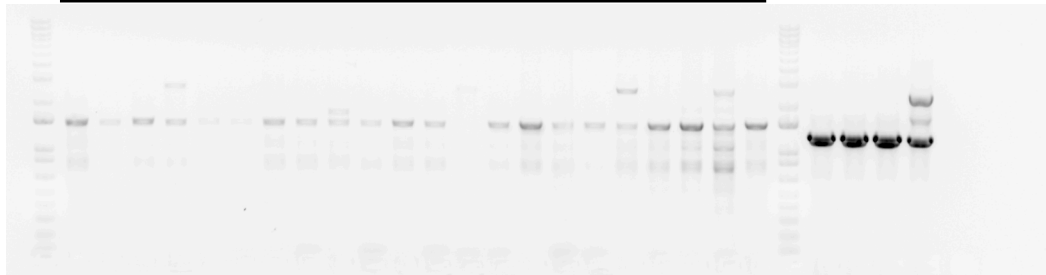

Clones 25-48

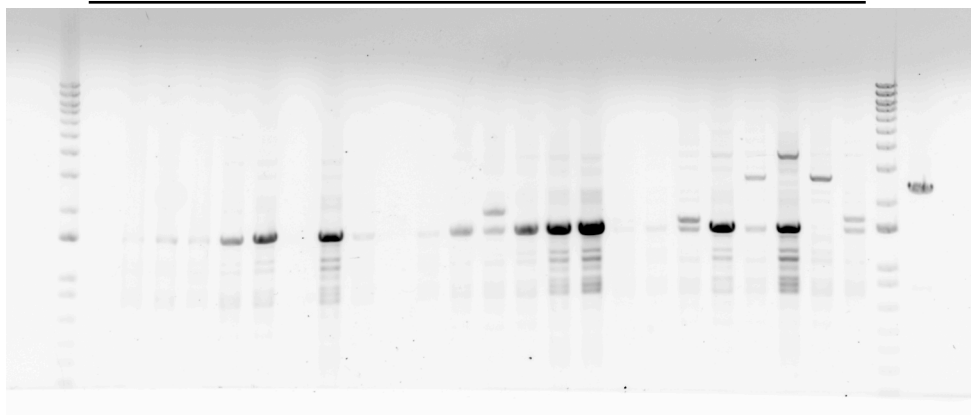

Supplement: 41588_2023_1366_MOESM6_ESM.pdf [file 41588_2023_1366_MOESM6_ESM.pdf]
